# Supplementary material for: Low energy multiple blue light-emitting diode light Irradiation promotes melanin synthesis and induces DNA damage in B16F10 melanoma cells
Source: PubMed Central journal article supplement (PMC9894472; doi:10.1371/journal.pone.0281062), 2023-02-02

## Supplemental figure 1

### Cyclin mRNA level after irradiation

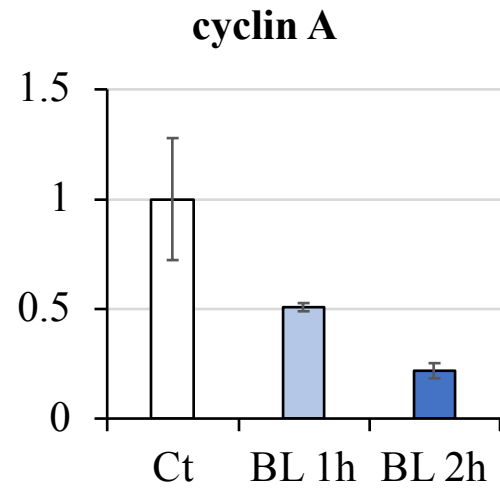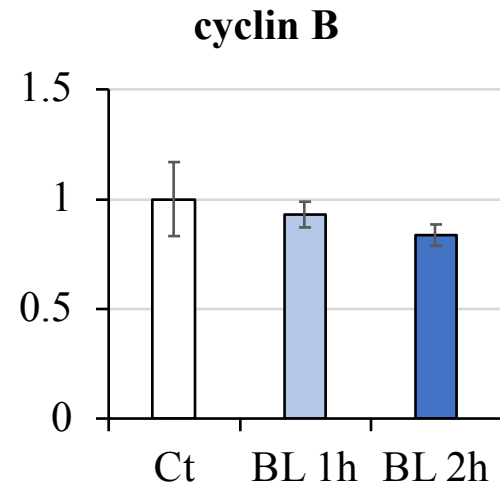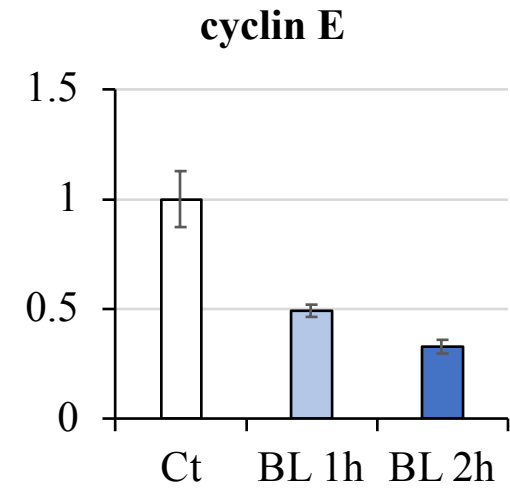

## Supplemental figure 2

### Cleaved - caspase 3 protein level after day 3 irradiation

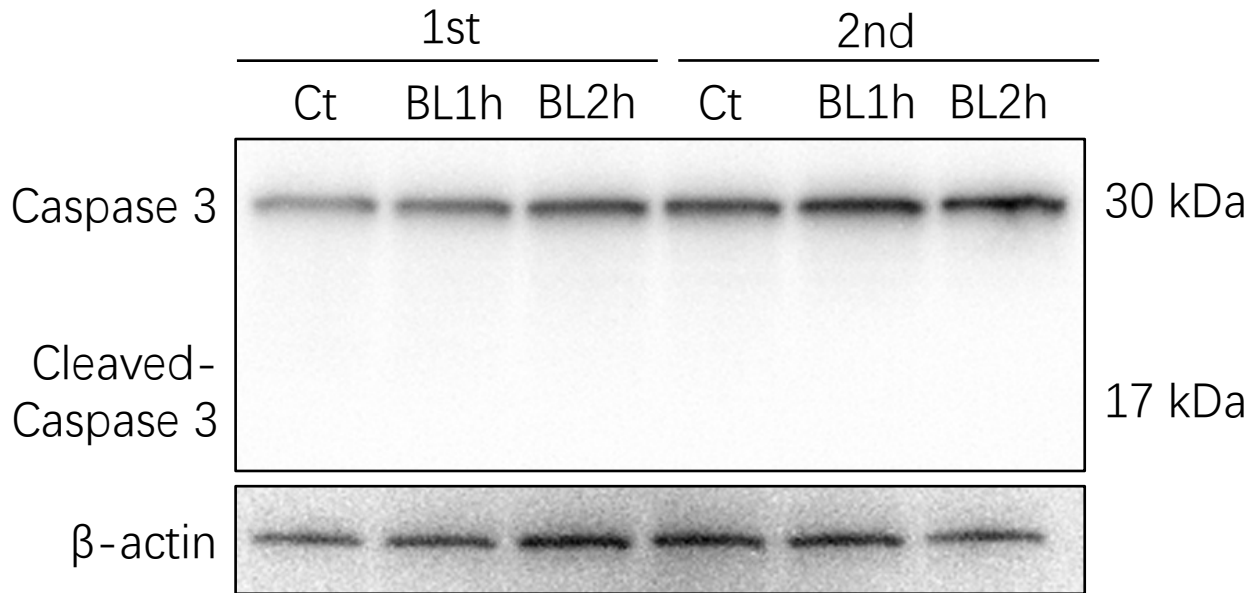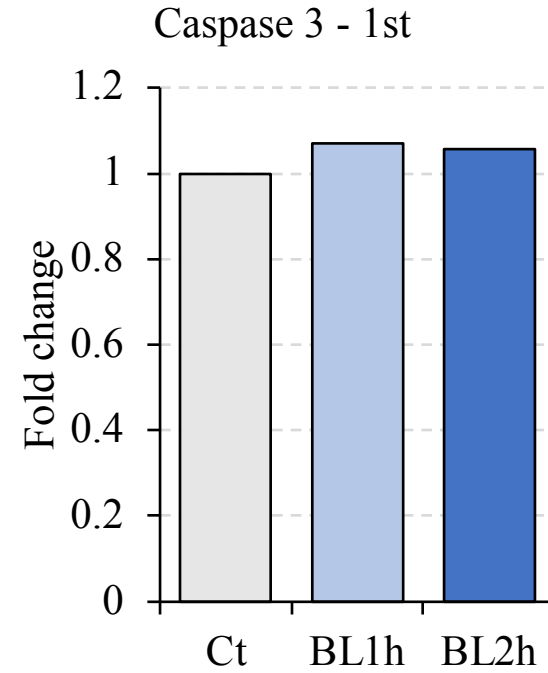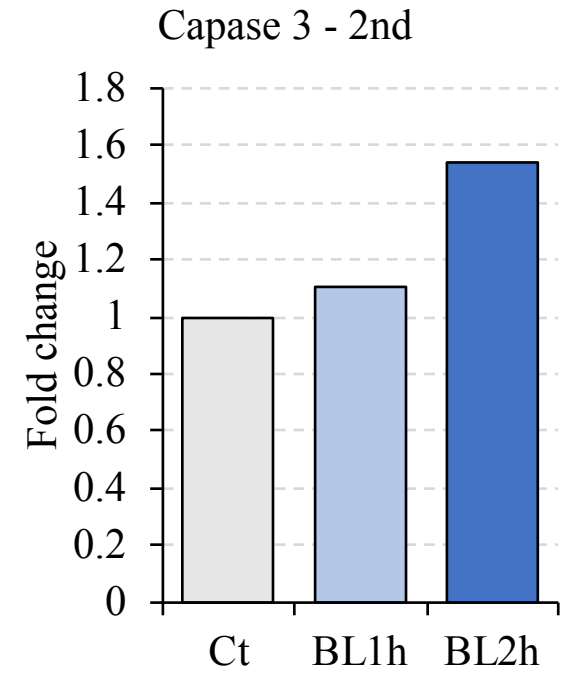

# Supplemental figure 3

## Clear field for ROS

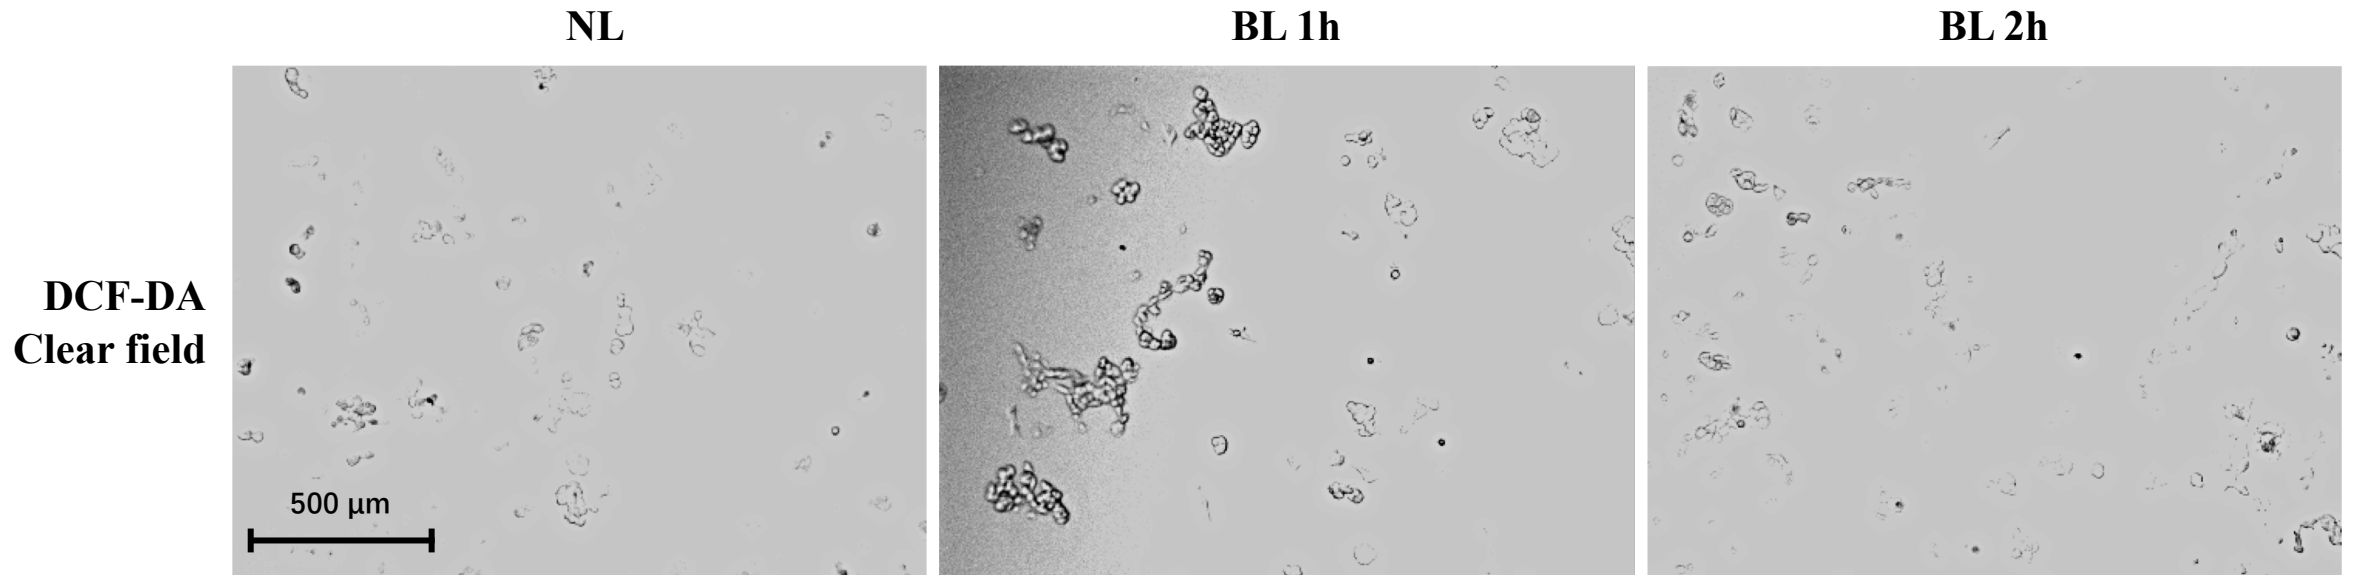

# Supplemental figure 4

## Clear field for DNA damage

NL

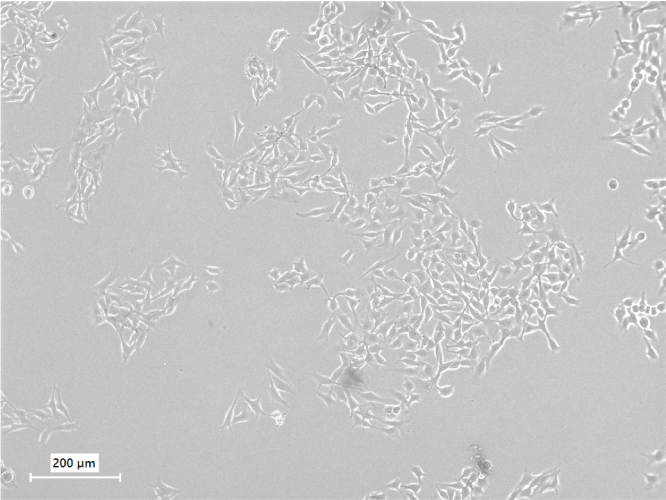

BL 1h

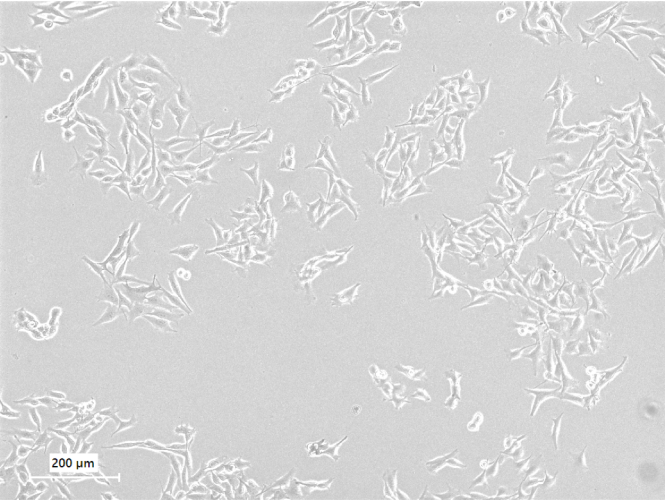

BL 2h

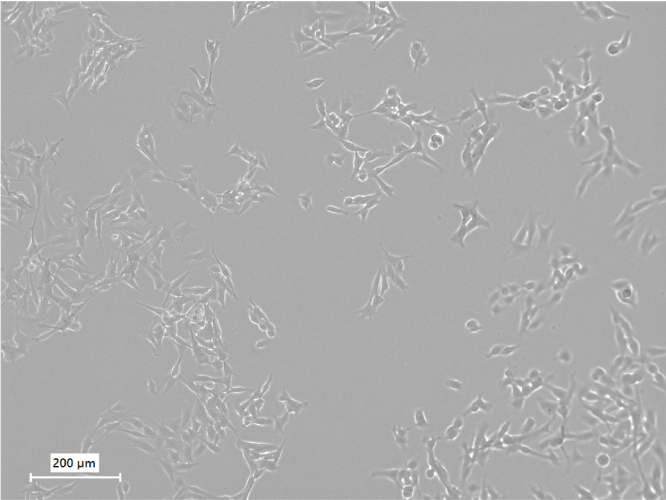

Supplement: pone.0281062.s003.pdf [file pone.0281062.s003.pdf]
